# Supplementary material
Source: PubMed Central journal article supplement (PMC4441570)
Supplement: NIHMS665065-supplement-Supp_Material.pdf [file NIHMS665065-supplement-Supp_Material.pdf]

# Supplementary Figure 1

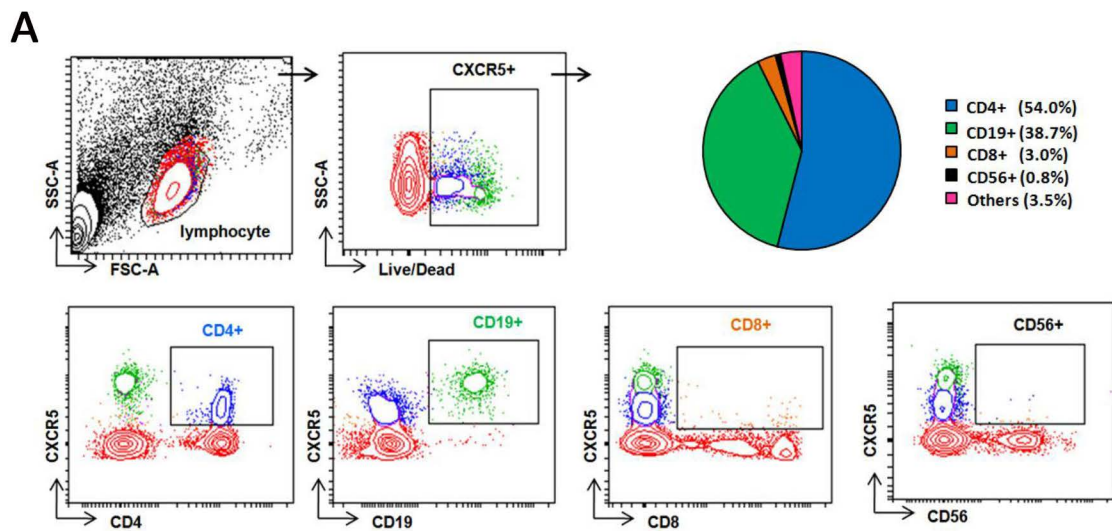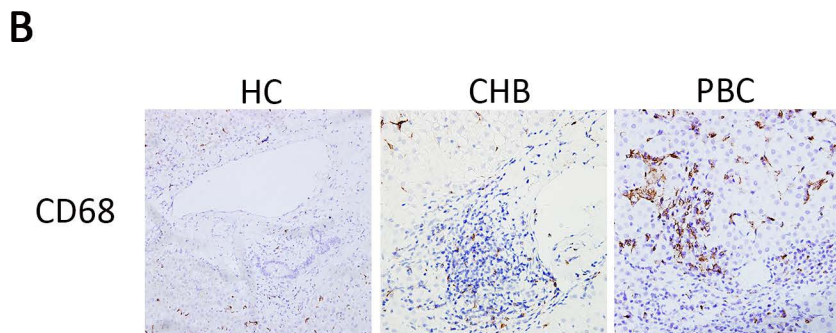

## Supplementary Table 1

Clinical characteristics and group sampling sizes of PBC patients and controls

|                          | HC                  | CHB                    | PBC                    |
|--------------------------|---------------------|------------------------|------------------------|
| Number                   | 52                  | 41                     | 66                     |
| Sex (male/female)        | 8/44                | 25/16                  | 16/50                  |
| Age (years)#             | 38 (22-52)          | 35 (15-61)             | 48 (19-72)             |
| AST(U/L)#                | 20.0<br>(18.0-31.0) | 152.0<br>(21.0-2420.0) | 82.0<br>(13.0-316.0)   |
| ALP (U/L)#               | 42.0<br>(35.0-76.0) | 178.0<br>(24.0-499.0)  | 230.0<br>(39.0-1120.0) |
| TB (umol/L) #            | 11.4 (4.2-20.4)     | 47.5 (20.9-371.2)      | 18.9 (4.9-591.5)       |
| AMA (+/-)                | 0/52                | ND                     | 66/0                   |
| Serum study              | 52                  | 0                      | 47                     |
| PBMC study               | 42                  | 36                     | 40                     |
| Liver tissue             | 14                  | 5                      | 8                      |
| Paraffin embedded tissue | 3                   | 5                      | 6                      |

#Median (range)

ND, no data

## Supplementary Table 2

Clinical characteristics of longitudinal study subjects at baseline

|                    | UR <sup>#</sup>    | NUR <sup>#</sup>    |
|--------------------|--------------------|---------------------|
| N                  | 15                 | 10                  |
| Sex (male/female)  | 3/12               | 1/9                 |
| Age (years)*       | 50 (42-60)         | 47 (38-59)          |
| AST(U/L)*          | 64.0 (26.0-244.0)  | 115.5 (31.0-316.0)  |
| ALP (U/L)*         | 316.0 (56.0-628.0) | 330.5 (143.0-789.0) |
| TB (μmol/L) *      | 15.5 (9.0-39.4)    | 40.2 (18.0-306.1)   |
| Cirrhosis (yes/no) | 5/10               | 7/3                 |
| AMA (+/-)          | 10/0               | 7/0                 |
| Serum study        | 10                 | 7                   |
| PBMC study         | 8                  | 5                   |
| Treatment duration | 24 weeks           | 24 weeks            |

#UR: UDCA biochemical response; NUR: non- UDCA biochemical response

\*Median(range)
